# Supplementary material
Source: publisher site journal article supplement (https://jamanetwork.com/crawlprevention/governor?content=%2fHttpHandlers%2fArticlePdfHandler.ashx%3fjournal%3dPEDS%26pdfFileName%3dPOI160049supp1_prod.pdf)
Supplement: Supplementary file 1 [file governor]

Validate User


We are sorry, but we are experiencing unusual traffic at this time. Please help us confirm that you are not a robot and we will take you to your content.

Could not validate captcha. Please try again.

Take me to my Content
